# Supplementary material
Source: publisher figshare collection journal article supplement (https://frontiersin.figshare.com/ndownloader/files/34018610)

## Supplementary Material

### *Independent Workstation*

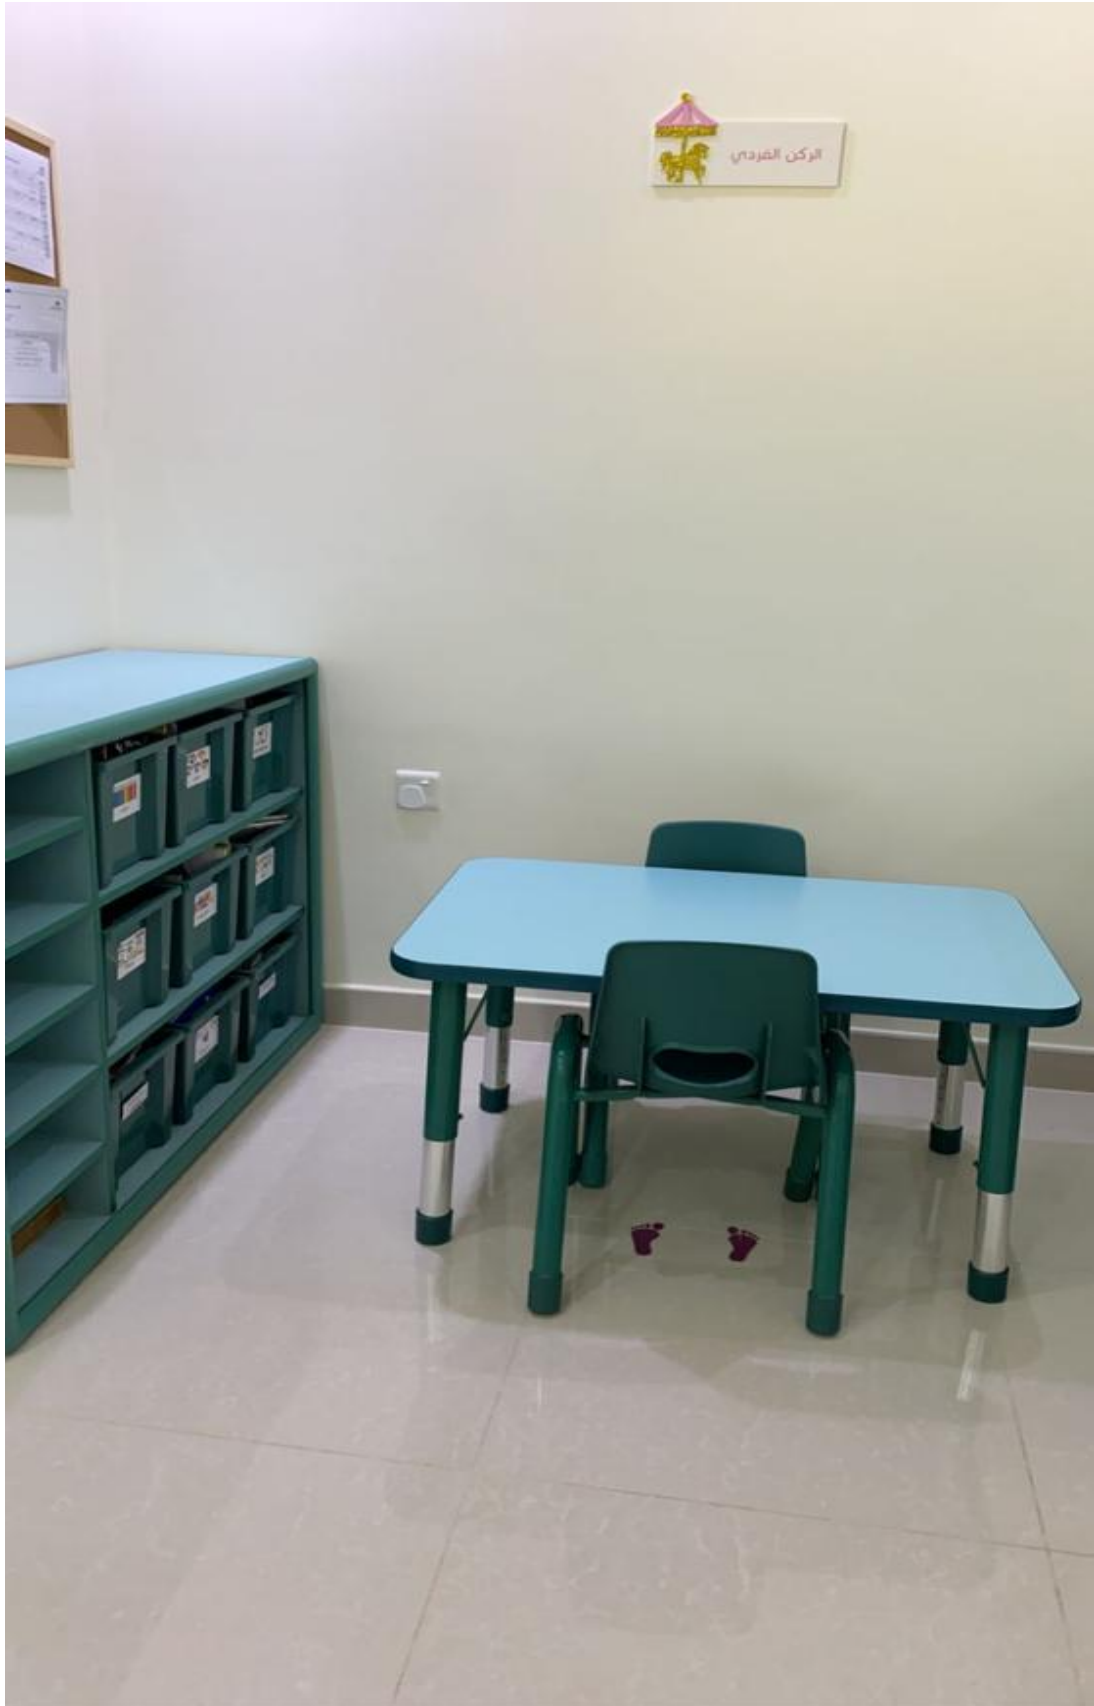

## Supplementary Material

### *A Small Group and Collaboration Station*

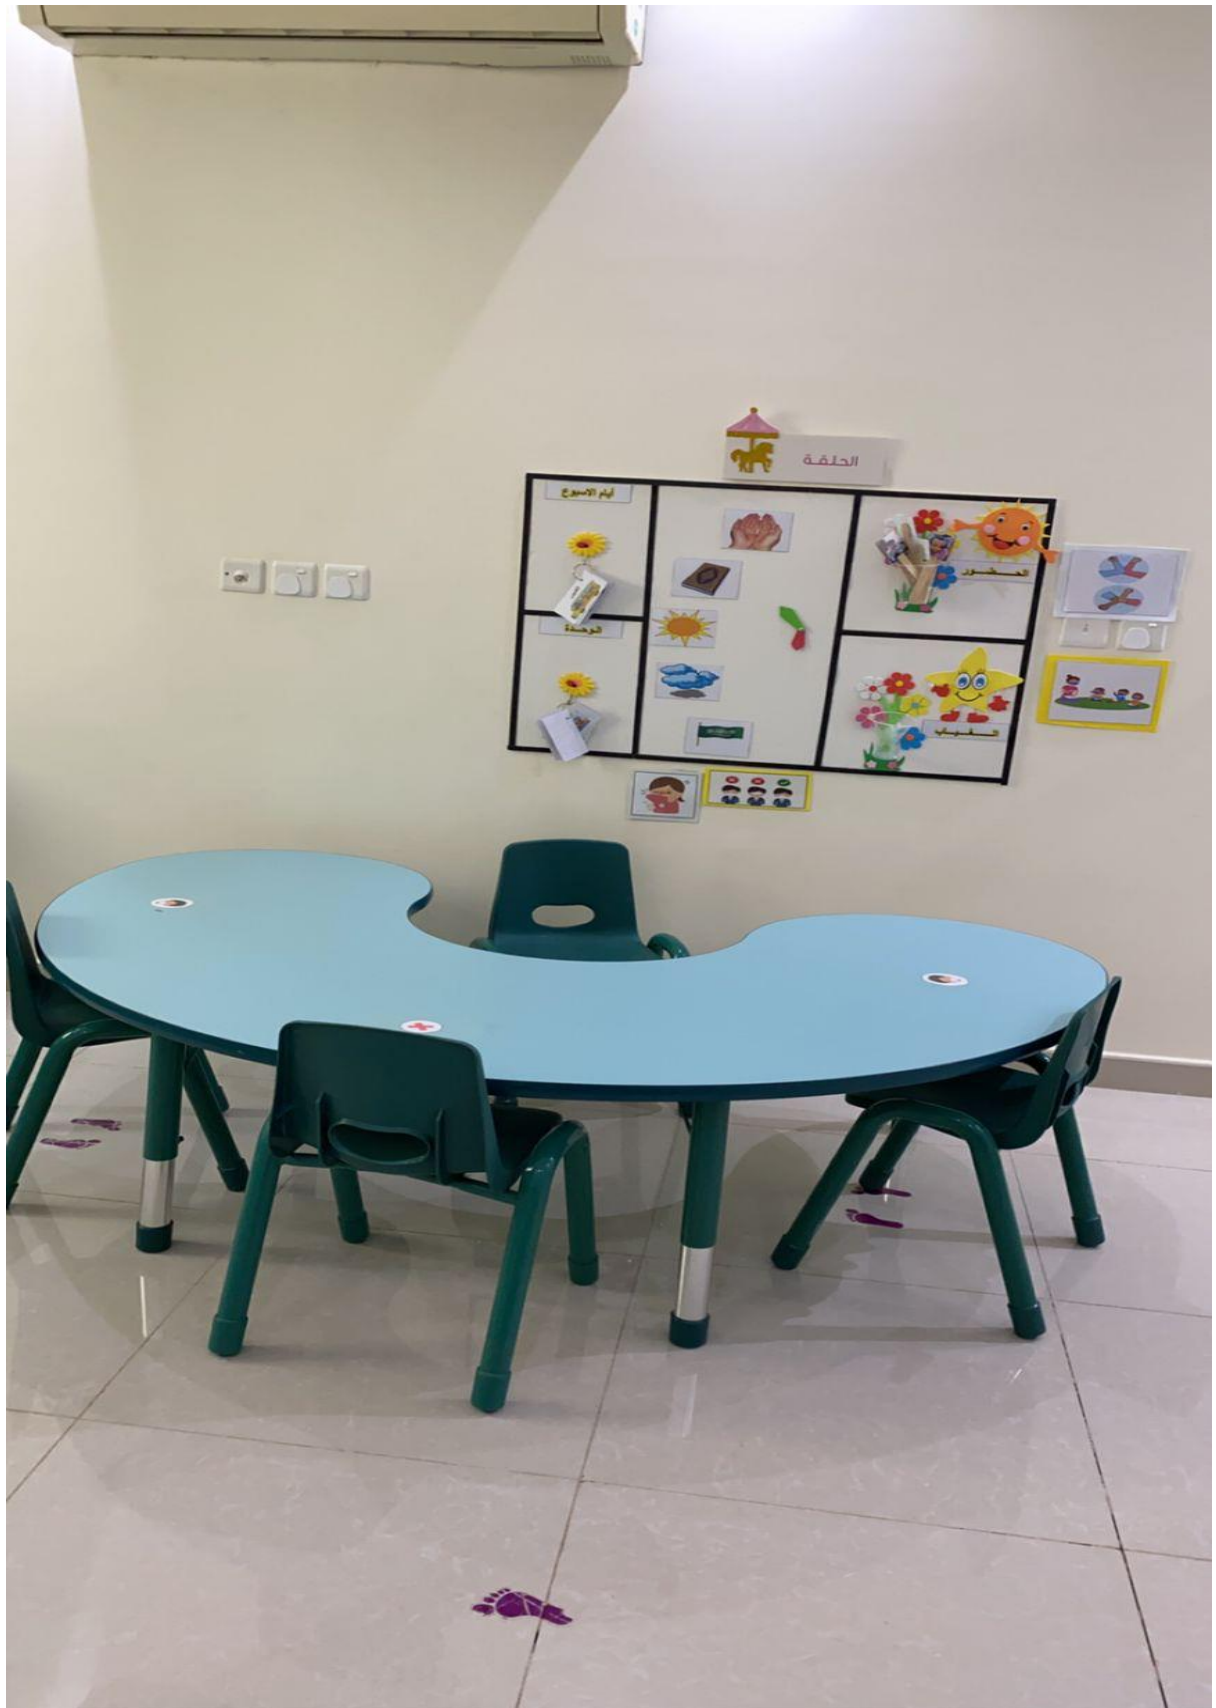

## Supplementary Material

### *Art Station*

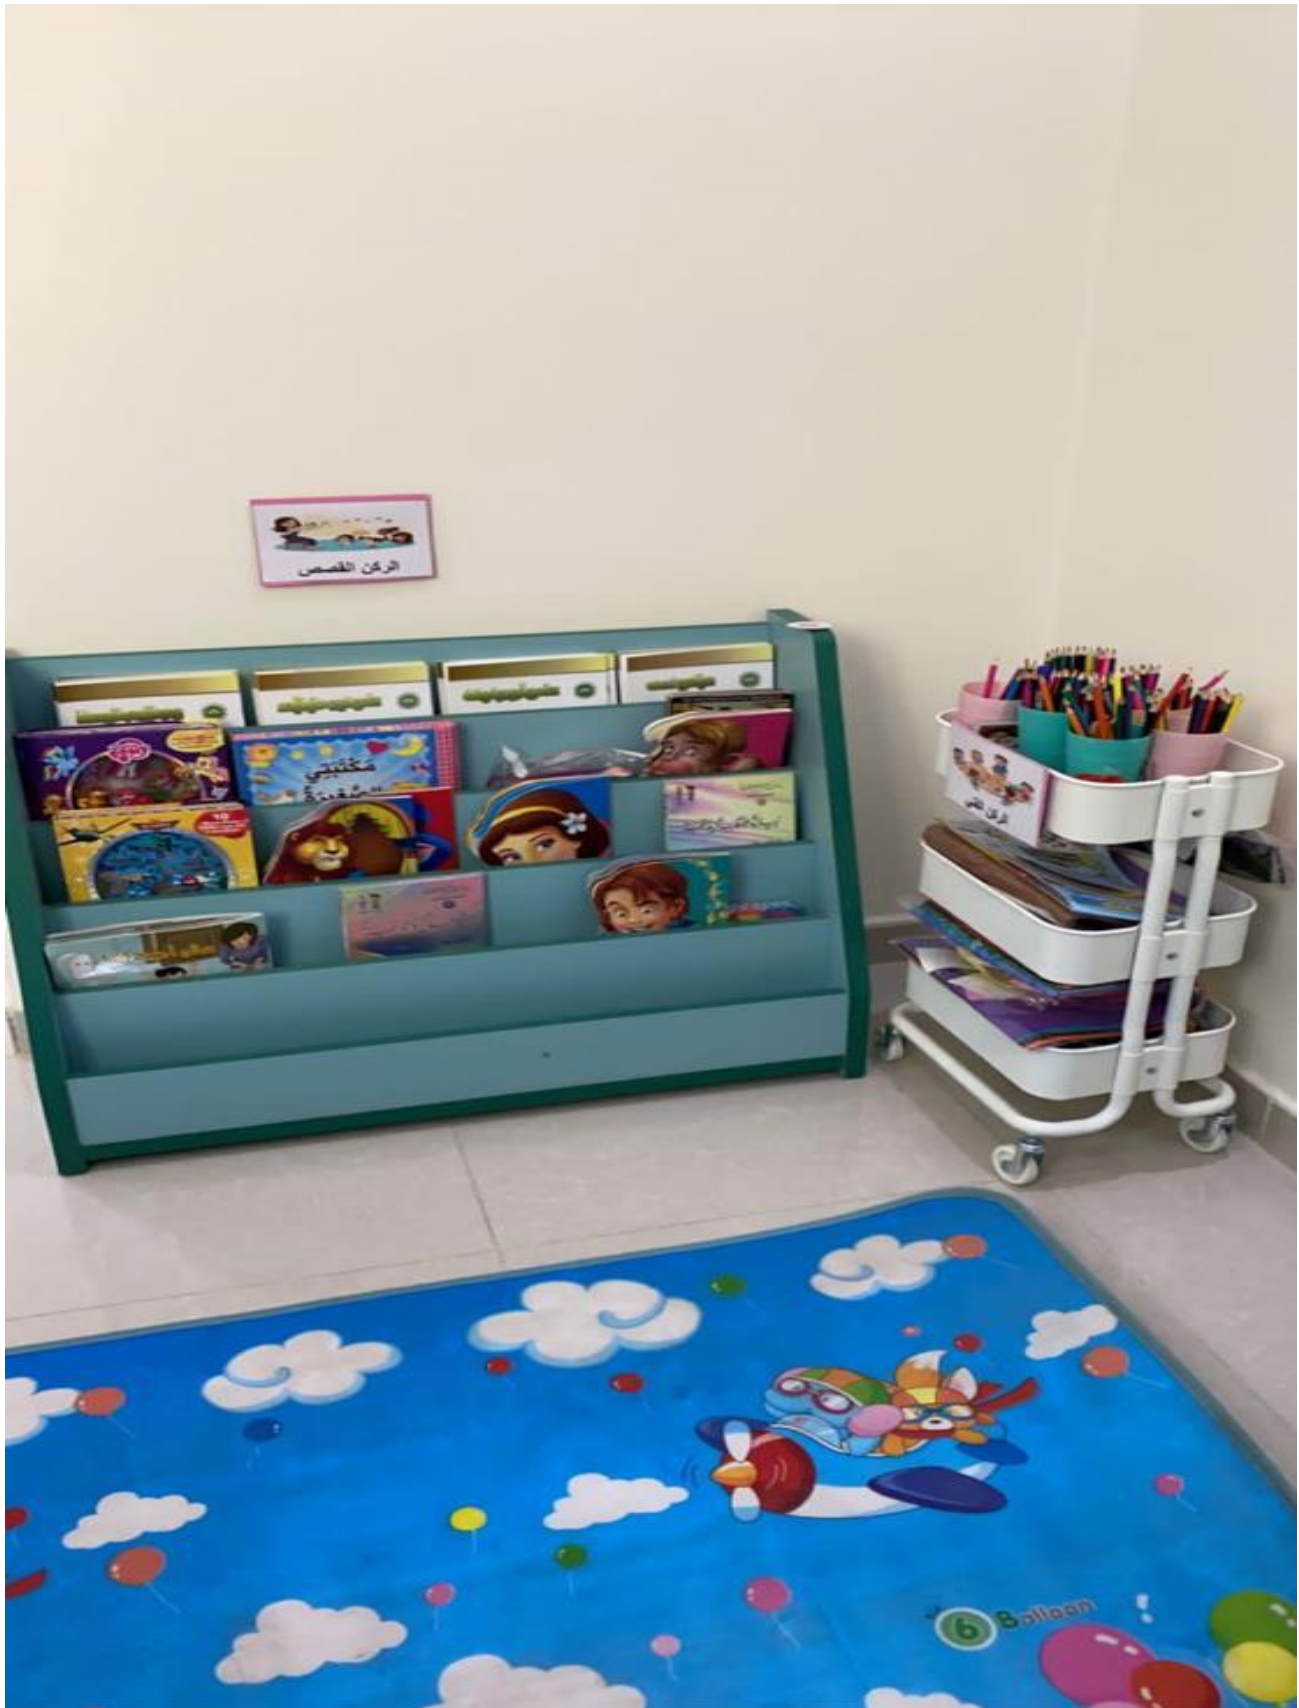



## Supplementary Material

### *Play and Stories Station*

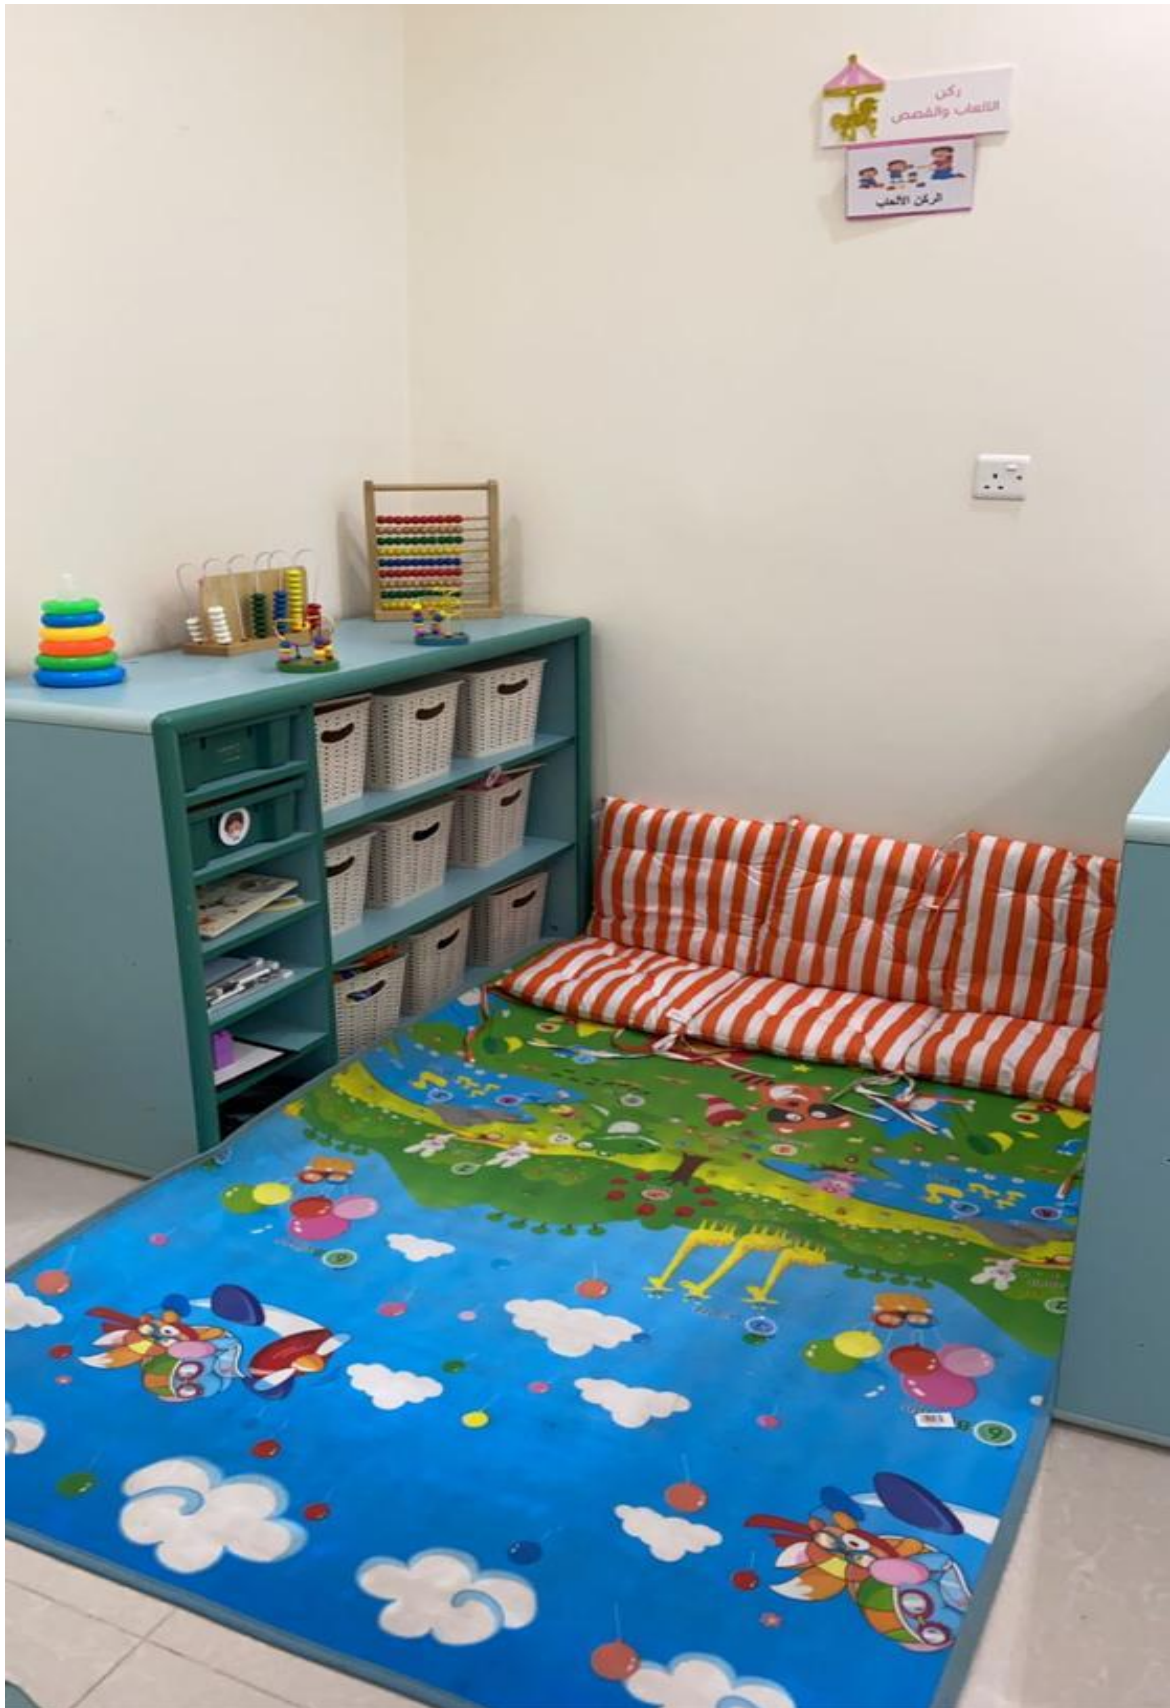

## Supplementary Material

### *Self-care Station*

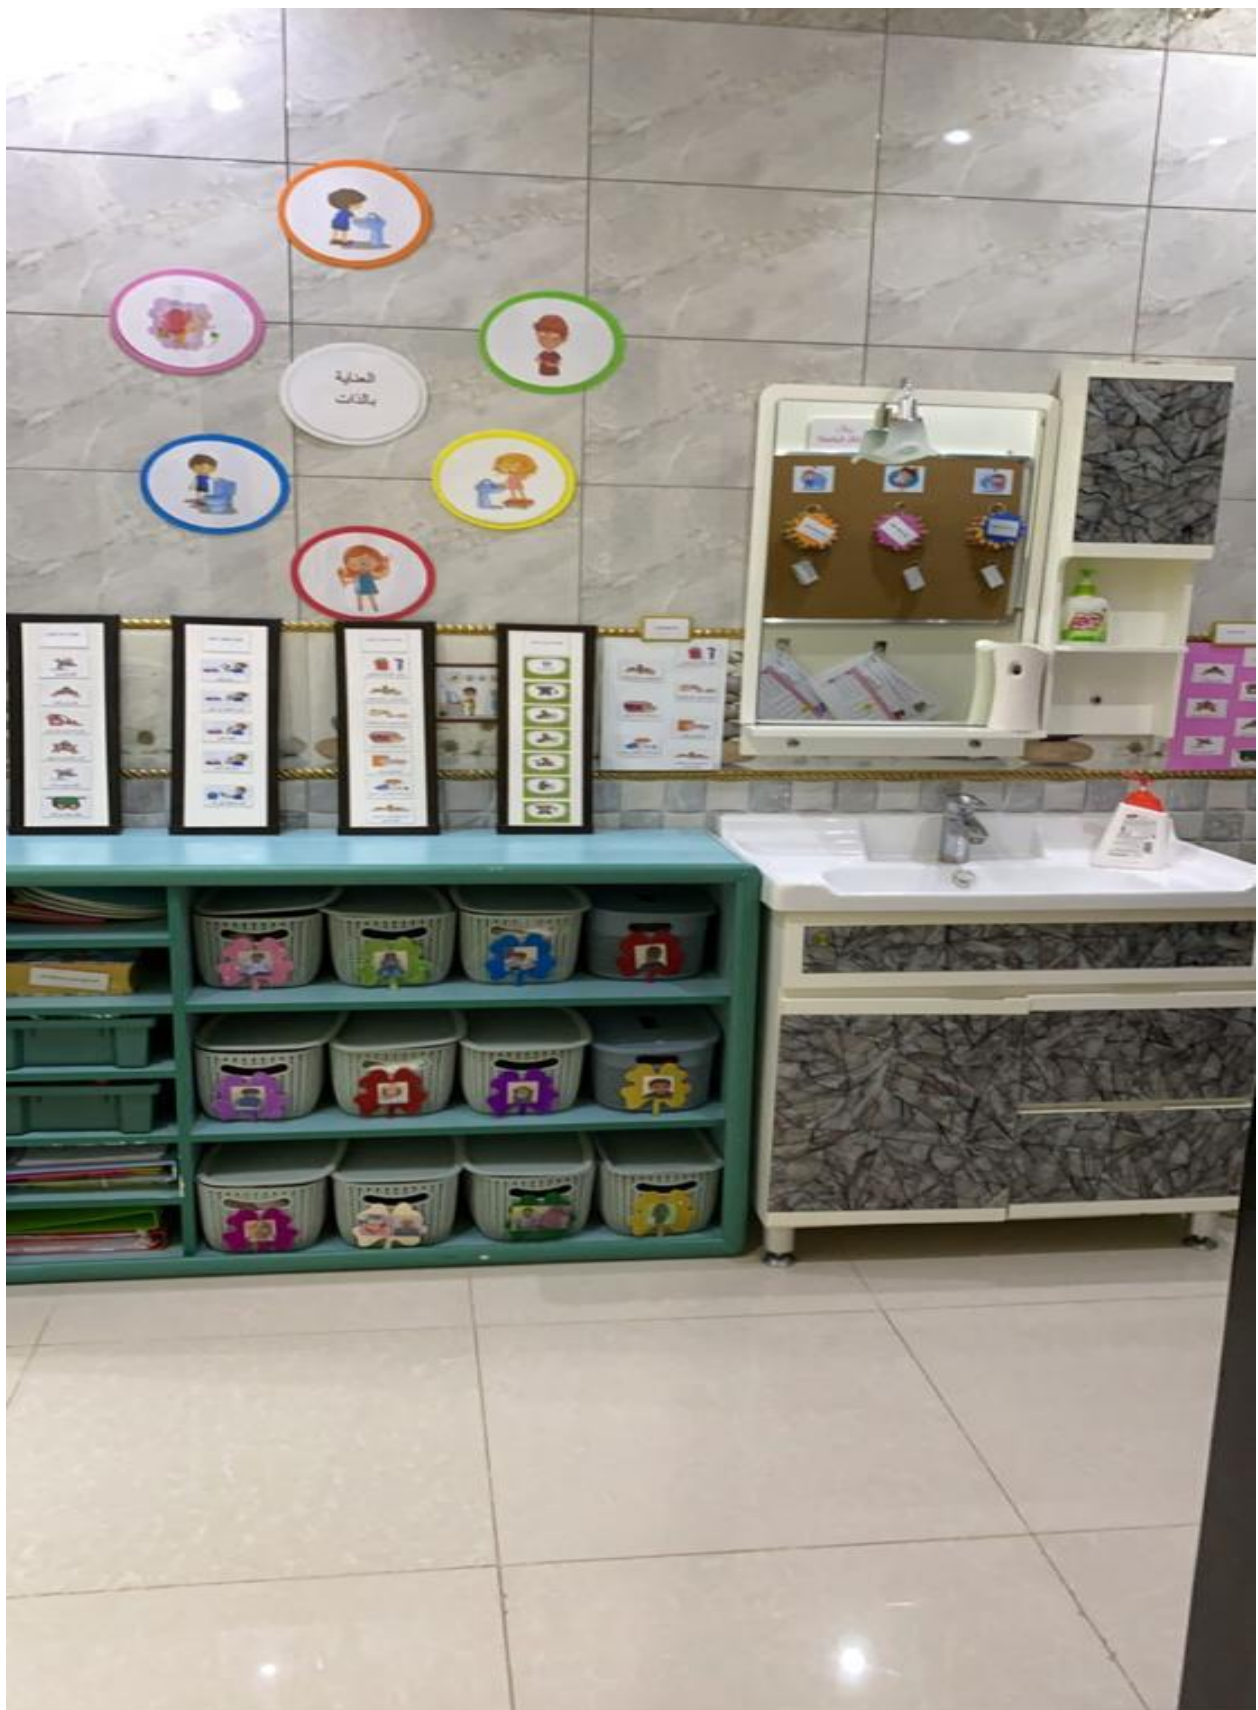

Supplement: Supplementary file [file 34018610]
